# Supplementary material for: A novel method for cetylpyridinium bromide determination in aqueous solution based on fluorescence quenching of dye
Source: Royal Society of Chemistry journal article supplement (doi:10.1039/c3ay41692e), 2013-12-06
Supplement: c3ay41692e.pdf [file c3ay41692e.pdf]

## Supporting Information

### A Novel Method for Cetylpyridinium Bromide Determination in Aqueous Solution Based on Fluorescence Quenching of Dye

Fengting Huang, Xiangfeng Guo\*, Lihua Jia\*, Rui Yang

**Corresponding author. Address:** Key Laboratory of Fine Chemicals of College of Heilongjiang Province, College of Chemistry and Chemical Engineering, Qiqihar University, Qiqihar 161006, China.

**Corresponding author. Mobile:** 86 0452 2742563 (X. Guo); 86 0452 2742563 (L. Jia).

**\*Corresponding author. Email address:** xfguo@163.com (X. Guo), jlh29@163.com (L. Jia)

#### Content

1. Fluorescence behavior of CXT vs. pH
2. Fluorescence decay profile of CXT
3. Fluorescence decay profile of CXT/CPB

### 1. Fluorescence behavior of CXT vs. pH

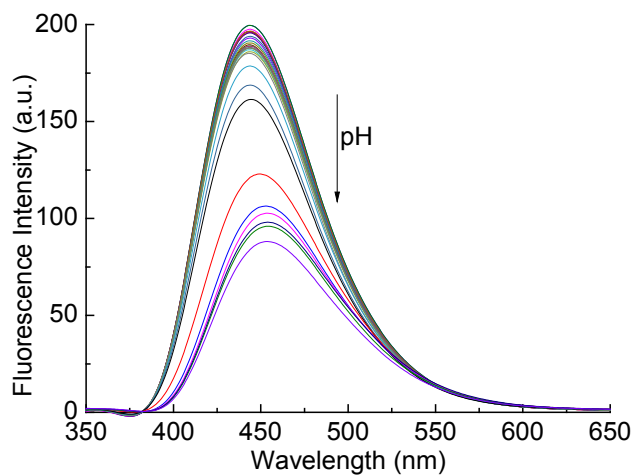

**Fig. S11** Fluorescence spectra of the CXT (5.0 μM) in aqueous solution of Brij 35 (1.2 mM) at different pH values.

### 2. Fluorescence decay profile of CXT

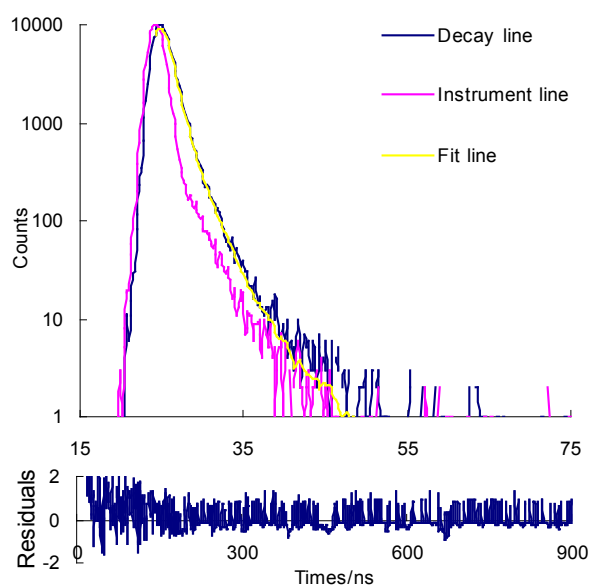

**Fig. S12** Fluorescence decay profile of CXT (5.0 μM) in aqueous solution of Brij 35 (1.2 mM) at pH 8.0.  $\lambda_{em} = 444$  nm, EX/EM slit = 13.0 / 13.0 nm.

### 3. Fluorescence decay profile of CXT/CPB

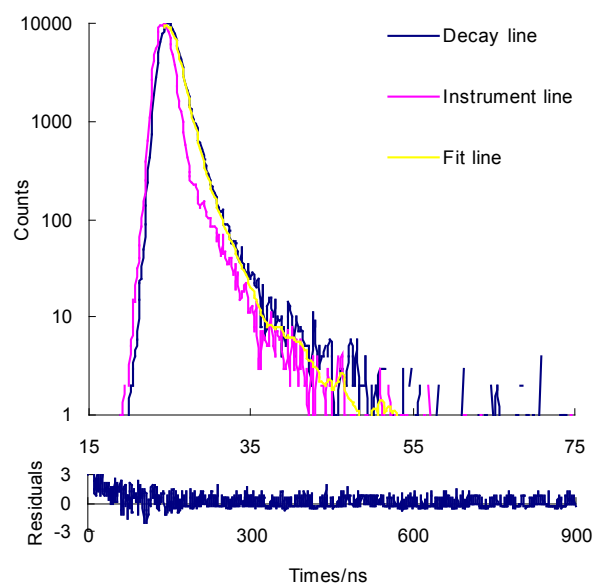

**Fig. SI3** Fluorescence decay profile of CXT/CPB (5.0  $\mu\text{M}$ / 20  $\mu\text{M}$ ) in aqueous solution of Brij 35 (1.2 mM) at pH 8.0.  $\lambda_{\text{em}} = 444$  nm, EX / EM slit = 13.0 / 13.0 nm.
